# Supplementary material
Source: PubMed Central journal article supplement (PMC7436474)
Supplement: JSO-122-1013-s001.pdf [file JSO-122-1013-s001.pdf]

## **SURVEY OF COMPLIANCE AND PERCEPTION RELATED TO USAGE OF PPE IN OPERATING ROOM**

1. Welcome to the survey to assess compliance and perception related to the usage of PPE in the OT.

**Dear Participant,**

**In the current situation of COVID-19 pandemic, the use of Personal Protective Equipment (PPE) has proven a vital link in curbing the spread of the virus amongst the hospital personnel.**

**With this survey, we intend to assess the mindset of the health personnel working in the operating theatres about the usage of PPE in general and the face shields in particular.**

**We are extremely grateful for you having taken your valuable time and having considered to participate in this survey.**

**Time required to complete the survey: 3 minutes.**

**This survey is conducted by the OT committee, Tata Memorial Hospital.**

**For any further details or clarifications about the survey, you may email [otcommitteetmh@gmail.com](mailto:otcommitteetmh@gmail.com)**

## SURVEY OF COMPLIANCE AND PERCEPTION RELATED TO USAGE OF PPE IN OPERATING ROOM

### 2. Survey Questions

\* 1. Which specialty do you belong to?

- Surgery
- Anaesthesiology
- Nursing

\* 2. If you are from the department of surgery kindly mention the DMG.

- Head and Neck
- GI surgery
- Gynaecology
- Urology
- Bone and soft tissue
- Plastic and Reconstructive surgery
- Breast
- Paediatrics
- Neurosurgery
- Thoracic
- N/A

\* 3. Are you aware of the PPE checklist that is being used in the OT?

- Yes
- No

\* 4. In your opinion has the implementation of the OT COVID-19 checklist improved the usage of PPE in the OT?

- Yes
- No

\* 5. Which of the following PPE do you use routinely in the OT?

- Face Shield
- Goggles
- N95
- Double gloves
- 3 Ply mask
- All of the above

\* 6. Which amongst the following do you think is a must while operating in the present situation

- Face shield
- Goggles
- N95
- Double gloves
- 3 Ply mask
- All of the above

\* 7. Which if the following face shields have you used in the recent past?

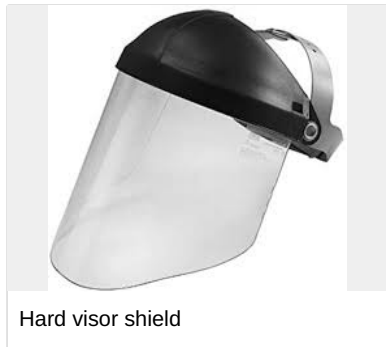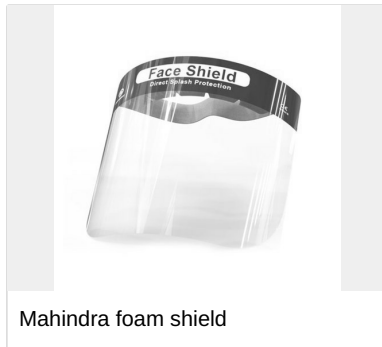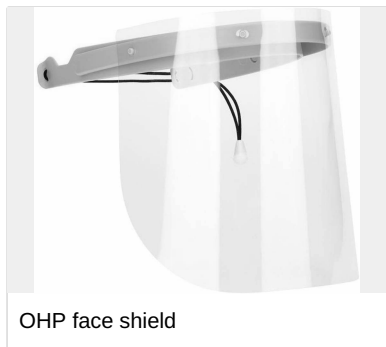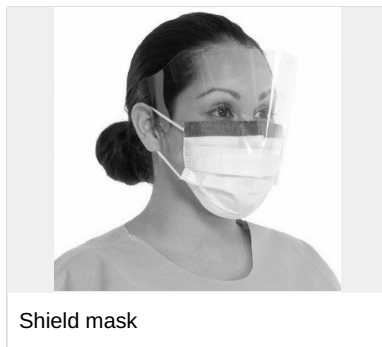

\* 8. How often do you use face shields in OT ?

Never Often Always

\* 9. If you are not using the face shield regularly, please specify the reason.

- Unavailability.
- Uncomfortable while operating
- Poor visibility while operating
- Fogging while operating
- Reuse compromises vision
- Can't wear along with loupes
- Prefer to use goggles over face shield
- N/A

Other (please specify)

\* 10. Of the above mentioned rank them in the order of preference.

|                      | 1st                   | 2nd                   | 3rd                   | 4th                   |
|----------------------|-----------------------|-----------------------|-----------------------|-----------------------|
| Visor hard shield    | <input type="radio"/> | <input type="radio"/> | <input type="radio"/> | <input type="radio"/> |
| Mahindra foam shield | <input type="radio"/> | <input type="radio"/> | <input type="radio"/> | <input type="radio"/> |
| OHP face shield      | <input type="radio"/> | <input type="radio"/> | <input type="radio"/> | <input type="radio"/> |
| Shield mask          | <input type="radio"/> | <input type="radio"/> | <input type="radio"/> | <input type="radio"/> |
