# Supplementary material
Source: PubMed Central journal article supplement (PMC7436474)

SOP for use of COVID-19 specific Team Briefing and Debriefing Form.

This form has to be done in addition to (but simultaneously as mentioned below) the existing surgical safety checklist.

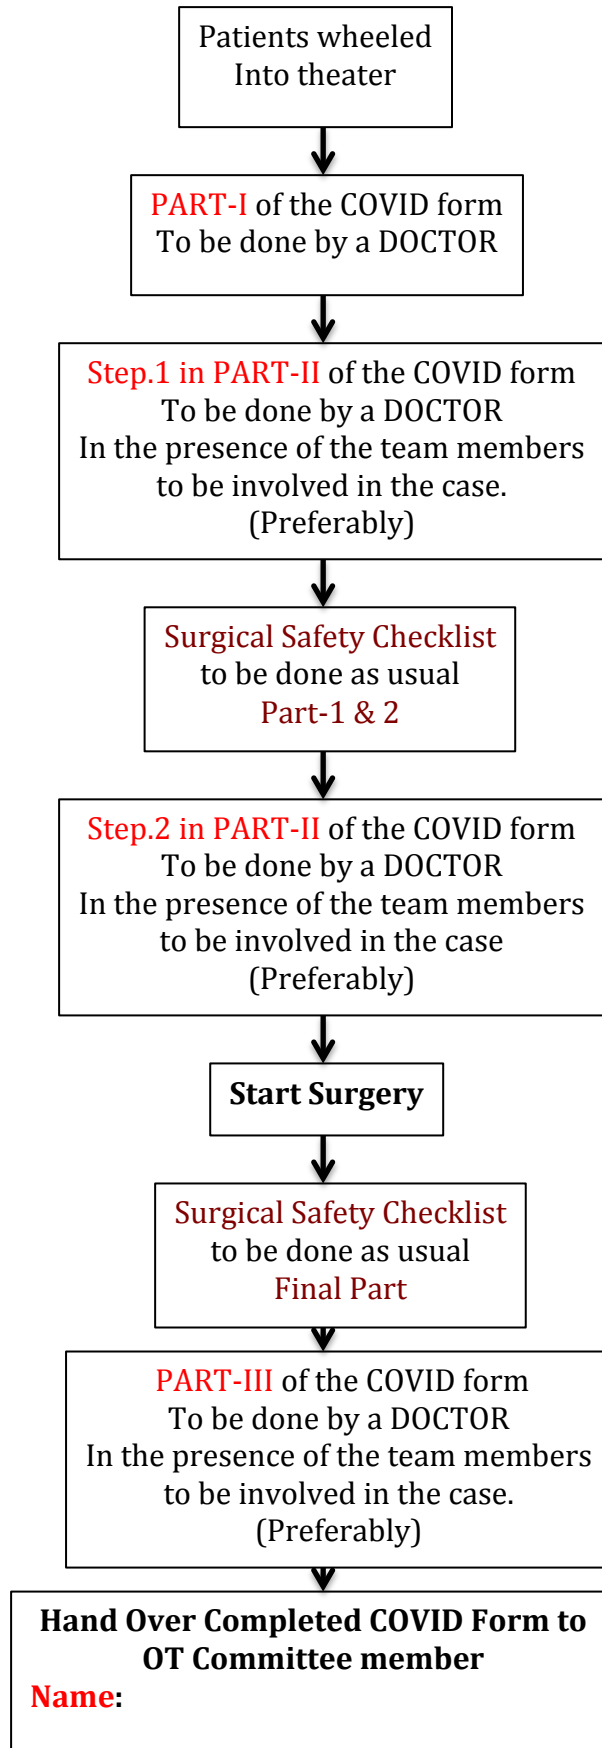

Supplement: JSO-122-1013-s002.pdf [file JSO-122-1013-s002.pdf]
