# Supplementary material
Source: PubMed Central journal article supplement (PMC7436474)
Supplement: JSO-122-1013-s003.pdf [file JSO-122-1013-s003.pdf]

**COVID-19 Specific Team Briefing & Debriefing form.**

| <b><u>PART-I</u></b>                                                                         |                     |
|----------------------------------------------------------------------------------------------|---------------------|
| <b><u>OT Number:</u></b>                                                                     | <b><u>Date:</u></b> |
| <b><u>Case Number &amp; Diagnosis:</u></b>                                                   |                     |
| <b><u>Date of admission:</u></b>                                                             |                     |
| <b><u>Pre-operative COVID-19 Test: Done/Not done (If done Status: Positive/Negative)</u></b> |                     |
| <b><u>Date of Test COVID-19 Testing:</u></b>                                                 |                     |

**PART-II. Team Briefing**

**(To be done by Surgeon/Anesthetist belonging to the team)**

**Step.1: As soon as the patient is wheeled inside the OT.**

**(All members should wear a glove before doing any examination or procedure on the patient)**

**(Tick the appropriate boxes)**

| <b><u>Team Members</u></b>               | <b><u>Surgical Cap</u></b> | <b><u>N-95 + 3-Ply Mask</u></b> | <b><u>Shield</u></b> | <b><u>Plastic apron</u></b> | <b><u>Gown</u></b> | <b><u>Gloves</u></b> |
|------------------------------------------|----------------------------|---------------------------------|----------------------|-----------------------------|--------------------|----------------------|
| <b><u>Anesthetist's</u></b>              |                            |                                 |                      |                             |                    |                      |
| <b><u>1.</u></b>                         |                            |                                 |                      |                             |                    |                      |
| <b><u>2.</u></b>                         |                            |                                 |                      |                             |                    |                      |
| <b><u>3.</u></b>                         |                            |                                 |                      |                             |                    |                      |
| <b><u>Surgeon's (Ablative)</u></b>       |                            |                                 |                      |                             |                    |                      |
| <b><u>4.</u></b>                         |                            |                                 |                      |                             |                    |                      |
| <b><u>5.</u></b>                         |                            |                                 |                      |                             |                    |                      |
| <b><u>6.</u></b>                         |                            |                                 |                      |                             |                    |                      |
| <b><u>Surgeon's (Reconstruction)</u></b> |                            |                                 |                      |                             |                    |                      |
| <b><u>7.</u></b>                         |                            |                                 |                      |                             |                    |                      |
| <b><u>8.</u></b>                         |                            |                                 |                      |                             |                    |                      |
| <b><u>9.</u></b>                         |                            |                                 |                      |                             |                    |                      |
| <b><u>Nursing Staff</u></b>              |                            |                                 |                      |                             |                    |                      |
| <b><u>10.</u></b>                        |                            |                                 |                      |                             |                    |                      |
| <b><u>11.</u></b>                        |                            |                                 |                      |                             |                    |                      |
| <b><u>OT-Technician</u></b>              |                            |                                 |                      |                             |                    |                      |
| <b><u>12.</u></b>                        |                            |                                 |                      |                             |                    |                      |
| <b><u>OT-Boy</u></b>                     |                            |                                 |                      |                             |                    |                      |
| <b><u>13.</u></b>                        |                            |                                 |                      |                             |                    |                      |
|                                          |                            |                                 |                      |                             |                    |                      |

**Step.2: At the time of doing the surgical check list**

1. Does your case require use of powered instruments? **Yes/No**
2. Please specify details (Saw/Micro motor/Microdebrider):

**PART-III: Team Debriefing**  
**(To be done at the end of the surgery)**

3. Was everyone **donning** the appropriate PPE during the entire surgery?  
**Yes/No** (If **No**, Please give details).
4. While using Powered instrument, were all other than the operating team away from the patient for atleast 6 feet? **Yes/No/Not applicable**, If **No**, give details.
5. Did **any new members join the team**, if **Yes give details** (name/s of the team member & event)
6. Any concerns?
